# Supplementary material for: Human-Camelid Interactions in the Wari Hinterlands: A stable isotopic analysis of camelid remains from Auquimarca (600-1000 CE), Huancayo, Peru
Source: Research Square preprint supplement (doi:10.21203/rs.3.rs-8099994/v1), 2025-12-01
Supplement: Supplementary file 1 [file 126daf3c86b800726f27be51.docx]

| Site Name | DMS Geographical Coordinates | Degree of Reliability |
| --- | --- | --- |
| Auquimarca | 12º05’14”S, 75º13’15”W | Coordinate taken by author through Google Earth. |
| Conchopata | 13º09’22”S, 74º12’27”W | Coordinate taken by author through Google Earth based on published site location (Finucane et al. 2006). |
| Cerro Baúl | 17º06’45”S, 70º51’37”W | Coordinate taken by author through Google Earth based on published site location (Thornton et al. 2011). |
| Castillo de Huarmey | 10º03’47”S, 78º08’16”W | Coordinate taken by author through Google Earth based on published site location (Tomczyk et al. 2019). |
| Huari | 13º03’33”S, 74º11’58”W | Coordinate taken by author through Google Earth based on published site location (Isbell 1997). |
| Wari Willka | 12º07’03”S, 75º12’21”W | Coordinate taken by author through Google Earth based on published site location (Browman 1970). |
| Beringa | 16º02’13”S, 72º28’47”W | Coordinate taken by author through Google Earth based on published site location (Alaica et al. 2022). |
| Quilcapampa | 16º14’52”S, 72º04’19”W | Coordinate taken by author through Google Earth based on published site location (Alaica et al. 2022). |
| Uraca | 16º14’42”S, 72º29’42”W | Coordinate taken by author through Google Earth based on published site location (Alaica et al. 2022). |
