# Supplementary material for: Human-Camelid Interactions in the Wari Hinterlands: A stable isotopic analysis of camelid remains from Auquimarca (600-1000 CE), Huancayo, Peru
Source: Research Square preprint supplement (doi:10.21203/rs.3.rs-8099994/v1), 2025-12-01
Supplement: Supplementary file 2 [file 2516f29e4457c9b0850b6b0c.xlsx]

## Sheet: Sheet1
Dunn Post Hoc Test	δ13C			δ18O
Comparison	Z	P (unadjusted)	P (adjusted)	Z	P (unadjusted)	P (adjusted)
AM-122 - AM-123	2.92921	0.00339828	1	0.618715	0.536104	1
AM-122 - AM-124	0.449575	0.653017	1	-1.28914	0.197349	1		Authors: Baker, Alaica, Locker, Krause, González, Palacios, Arambúru, & Tung
AM-123 - AM-124	-6.25539	3.96519e-10	1.96673e-07	-4.87711	1.07654e-06	0.000522122		Title: Human-Camelid Interactions in the Wari Hinterlands: A stable isotopic analysis of camelid remains from Auquimarca (600-1000 CE), Huancayo, Peru
AM-122 - AM-125	1.17033	0.241868	1	0.36758	0.713187	1		Journal Name: Archaeological and Anthropological Sciences
AM-123 - AM-125	-4.07483	4.60486e-05	0.02086	-0.569051	0.569322	1		Corresponding Author: Lilian Baker, Vanderbilt University (lilian.j.baker@vanderbilt.edu)
AM-124 - AM-125	1.62289	0.104613	1	3.67233	0.000240345	0.109838
AM-122 - AM-126	1.95909	0.0501024	1	-0.162197	0.871151	1
AM-123 - AM-126	-2.03374	0.0419783	1	-1.77482	0.0759279	1
AM-124 - AM-126	3.29306	0.000991048	0.398402	2.39175	0.0167681	1
AM-125 - AM-126	1.64821	0.0993088	1	-1.08835	0.276442	1
AM-122 - AM-127	2.61531	0.00891468	1	0.233574	0.815315	1
AM-123 - AM-127	-0.179957	0.857186	1	-0.671478	0.501916	1
AM-124 - AM-127	4.14546	3.39136e-05	0.0156003	2.72682	0.00639481	1
AM-125 - AM-127	2.74781	0.00599952	1	-0.21022	0.833496	1
AM-126 - AM-127	1.32366	0.185615	1	0.693285	0.488131	1
AM-122 - AM-128	0.940706	0.346855	1	0	1	1
AM-123 - AM-128	-3.06589	0.00217025	0.822523	-1.01036	0.312324	1
AM-124 - AM-128	0.933819	0.350397	1	2.05393	0.0399822	1
AM-125 - AM-128	-0.229081	0.818806	1	-0.575886	0.564692	1
AM-126 - AM-128	-1.46091	0.144041	1	0.251274	0.801602	1
AM-127 - AM-128	-2.40621	0.0161192	1	-0.341918	0.732413	1
AM-122 - AM-129	0.452595	0.65084	1	-0.482154	0.629697	1
AM-123 - AM-129	-4.89831	9.66626e-07	0.000468814	-2.26023	0.0238068	1
AM-124 - AM-129	0.0443194	0.96465	1	1.50421	0.132527	1
AM-125 - AM-129	-1.30774	0.19096	1	-1.61037	0.107318	1
AM-126 - AM-129	-2.73006	0.00633224	1	-0.605898	0.544582	1
AM-127 - AM-129	-3.61976	0.000294873	0.125911	-1.17664	0.239338	1
AM-128 - AM-129	-0.808494	0.418806	1	-0.723231	0.469538	1
AM-122 - AM-130	1.37228	0.169977	1	0.182748	0.854996	1
AM-123 - AM-130	-3.1944	0.00140123	0.554887	-0.914231	0.360596	1
AM-124 - AM-130	1.95724	0.0503197	1	3.00051	0.00269532	1
AM-125 - AM-130	0.446076	0.655542	1	-0.356416	0.721529	1
AM-126 - AM-130	-1.10025	0.271223	1	0.666463	0.505115	1
AM-127 - AM-130	-2.23359	0.0255104	1	-0.0987665	0.921324	1
AM-128 - AM-130	0.560025	0.575463	1	0.279152	0.780128	1
AM-129 - AM-130	1.62905	0.103303	1	1.19823	0.230828	1
AM-122 - AM-131	2.33633	0.0194743	1	-1.44604	0.148165	1
AM-123 - AM-131	-1.24995	0.211319	1	-4.96295	6.94304e-07	0.000337432
AM-124 - AM-131	4.23013	2.33551e-05	0.0108368	-0.383052	0.701681	1
AM-125 - AM-131	2.47345	0.0133815	1	-3.84728	0.000119438	0.0555387
AM-126 - AM-131	0.741366	0.458471	1	-2.62848	0.00857682	1
AM-127 - AM-131	-0.728244	0.466464	1	-2.93107	0.00337799	1
AM-128 - AM-131	2.05585	0.0397974	1	-2.26552	0.0234811	1
AM-129 - AM-131	3.4771	0.000506861	0.210347	-1.76392	0.0777457	1
AM-130 - AM-131	1.84389	0.0651986	1	-3.20547	0.00134842	0.585214
AM-122 - AM-132	0.528749	0.596979	1	-0.558492	0.576509	1
AM-123 - AM-132	-3.81802	0.00013453	0.0589239	-2.03002	0.0423546	1
AM-124 - AM-132	0.211199	0.832732	1	1.07427	0.2827	1
AM-125 - AM-132	-0.931718	0.351482	1	-1.52845	0.1264	1
AM-126 - AM-132	-2.15024	0.0315361	1	-0.683262	0.494441	1
AM-127 - AM-132	-3.02903	0.00245343	0.920036	-1.18628	0.235513	1
AM-128 - AM-132	-0.582595	0.560166	1	-0.789827	0.429629	1
AM-129 - AM-132	0.157133	0.87514	1	-0.159823	0.873021	1
AM-130 - AM-132	-1.23275	0.21767	1	-1.19117	0.233589	1
AM-131 - AM-132	-2.75848	0.00580706	1	1.31295	0.1892	1
AM-122 - AM-133	2.47879	0.013183	1	0.00493467	0.996063	1
AM-123 - AM-133	-0.451199	0.651846	1	-1.12574	0.260276	1
AM-124 - AM-133	3.88745	0.000101301	0.0449777	2.29473	0.0217485	1
AM-125 - AM-133	2.49855	0.0124701	1	-0.627657	0.530229	1
AM-126 - AM-133	1.08014	0.28008	1	0.285446	0.775303	1
AM-127 - AM-133	-0.215861	0.829096	1	-0.361511	0.717718	1
AM-128 - AM-133	2.20636	0.0273589	1	0.00722362	0.994236	1
AM-129 - AM-133	3.39223	0.000693273	0.285629	0.795578	0.426277	1
AM-130 - AM-133	1.99712	0.045812	1	-0.297249	0.766276	1
AM-131 - AM-133	0.478989	0.631946	1	2.51363	0.0119495	1
AM-132 - AM-133	2.82918	0.00466676	1	0.851584	0.394445	1
AM-122 - AM-134	2.40242	0.0162872	1	-0.562281	0.573924	1
AM-123 - AM-134	-0.998349	0.31811	1	-2.70922	0.00674425	1
AM-124 - AM-134	4.25477	2.09268e-05	0.00975191	1.52385	0.127547	1
AM-125 - AM-134	2.56394	0.010349	1	-1.91476	0.0555234	1
AM-126 - AM-134	0.886652	0.375266	1	-0.80017	0.423613	1
AM-127 - AM-134	-0.567524	0.570358	1	-1.37567	0.168923	1
AM-128 - AM-134	2.1477	0.0317373	1	-0.871083	0.383709	1
AM-129 - AM-134	3.53946	0.000400944	0.167595	-0.124554	0.900877	1
AM-130 - AM-134	1.95212	0.0509241	1	-1.43524	0.151218	1
AM-131 - AM-134	0.174364	0.861579	1	1.80206	0.0715352	1
AM-132 - AM-134	2.83704	0.0045534	1	0.063453	0.949406	1
AM-133 - AM-134	-0.324	0.745938	1	-0.967833	0.333128	1
AM-122 - AM-135	0.478651	0.632187	1	-1.23038	0.218556	1
AM-123 - AM-135	-4.42507	9.64128e-06	0.00456996	-3.58006	0.000343522	0.155615
AM-124 - AM-135	0.107553	0.91435	1	-0.0397894	0.968261	1
AM-125 - AM-135	-1.15318	0.248837	1	-2.88302	0.00393885	1
AM-126 - AM-135	-2.48763	0.0128597	1	-1.91806	0.0551033	1
AM-127 - AM-135	-3.37835	0.000729214	0.298978	-2.31471	0.0206288	1
AM-128 - AM-135	-0.721541	0.470577	1	-1.80109	0.071689	1
AM-129 - AM-135	0.0586663	0.953218	1	-1.26328	0.20649	1
AM-130 - AM-135	-1.46721	0.142318	1	-2.43687	0.0148149	1
AM-131 - AM-135	-3.17274	0.00151007	0.594966	0.25827	0.796198	1
AM-132 - AM-135	-0.0987203	0.92136	1	-0.956728	0.338705	1
AM-133 - AM-135	-3.16249	0.00156425	0.611622	-1.9532	0.0507959	1
AM-134 - AM-135	-3.24377	0.00117958	0.470652	-1.23567	0.21658	1
AM-122 - AM-136	0.952196	0.340997	1	-1.04892	0.294215	1
AM-123 - AM-136	-3.8385	0.000123788	0.0545906	-3.46252	0.000535135	0.23867
AM-124 - AM-136	1.04352	0.296707	1	0.370681	0.710875	1
AM-125 - AM-136	-0.347743	0.728034	1	-2.69943	0.00694588	1
AM-126 - AM-136	-1.79539	0.0725908	1	-1.66622	0.0956697	1
AM-127 - AM-136	-2.80392	0.00504857	1	-2.10217	0.0355385	1
AM-128 - AM-136	-0.0590926	0.952878	1	-1.57338	0.115631	1
AM-129 - AM-136	0.865334	0.386855	1	-0.981667	0.326264	1
AM-130 - AM-136	-0.725236	0.468307	1	-2.22355	0.026179	1
AM-131 - AM-136	-2.5171	0.0118325	1	0.674857	0.499767	1
AM-132 - AM-136	0.592269	0.553671	1	-0.690326	0.489989	1
AM-133 - AM-136	-2.57638	0.00998406	1	-1.7211	0.0852322	1
AM-134 - AM-136	-2.60479	0.00919295	1	-0.935768	0.349393	1
AM-135 - AM-136	0.757179	0.448943	1	0.337751	0.735551	1
AM-122 - AM-137	0.417677	0.676183	1	-0.954906	0.339625	1
AM-123 - AM-137	-4.97239	6.61336e-07	0.000321409	-3.26309	0.00110204	0.482693
AM-124 - AM-137	-0.0255172	0.979642	1	0.558707	0.576361	1
AM-125 - AM-137	-1.37484	0.169181	1	-2.51878	0.0117763	1
AM-126 - AM-137	-2.79539	0.00518374	1	-1.49034	0.136136	1
AM-127 - AM-137	-3.67678	0.000236192	0.101326	-1.94865	0.0513377	1
AM-128 - AM-137	-0.860871	0.389309	1	-1.43236	0.152041	1
AM-129 - AM-137	-0.0604803	0.951773	1	-0.818831	0.412883	1
AM-130 - AM-137	-1.69222	0.0906044	1	-2.05347	0.040027	1
AM-131 - AM-137	-3.5442	0.000393805	0.165004	0.855507	0.392271	1
AM-132 - AM-137	-0.20951	0.83405	1	-0.549306	0.582795	1
AM-133 - AM-137	-3.44925	0.000562152	0.232731	-1.56758	0.116979	1
AM-134 - AM-137	-3.60479	0.000312408	0.132461	-0.759885	0.447323	1
AM-135 - AM-137	-0.115688	0.9079	1	0.491274	0.623233	1
AM-136 - AM-137	-0.925814	0.354542	1	0.162836	0.870648	1
AM-122 - AM-138	1.62193	0.104819	1	0.61733	0.537017	1
AM-123 - AM-138	-2.82118	0.00478472	1	0.0457633	0.963499	1
AM-124 - AM-138	2.56164	0.0104178	1	4.08278	4.44996e-05	0.0210483
AM-125 - AM-138	0.951771	0.341213	1	0.521837	0.601784	1
AM-126 - AM-138	-0.674328	0.500103	1	1.55905	0.118984	1
AM-127 - AM-138	-1.89873	0.0575997	1	0.63628	0.524594	1
AM-128 - AM-138	0.938573	0.34795	1	0.956363	0.338889	1
AM-129 - AM-138	2.11449	0.0344736	1	2.02911	0.0424469	1
AM-130 - AM-138	0.452378	0.650997	1	0.831426	0.405733	1
AM-131 - AM-138	-1.43781	0.150488	1	4.23866	2.24858e-05	0.0107707
AM-132 - AM-138	1.62791	0.103544	1	1.8909	0.0586378	1
AM-133 - AM-138	-1.65521	0.0978823	1	1.04412	0.29643	1
AM-134 - AM-138	-1.56098	0.118528	1	2.35922	0.0183133	1
AM-135 - AM-138	1.91256	0.0558039	1	3.24763	0.00116372	0.507383
AM-136 - AM-138	1.17982	0.238072	1	3.08943	0.00200538	0.86031
AM-137 - AM-138	2.17981	0.0292712	1	2.91355	0.00357343	1
AM-122 - AM-139	1.01886	0.308269	1	0.242703	0.808236	1
AM-123 - AM-139	-4.62791	3.69376e-06	0.00176931	-0.908779	0.363467	1
AM-124 - AM-139	1.3112	0.18979	1	3.49947	0.000466185	0.209317
AM-125 - AM-139	-0.344401	0.730545	1	-0.275864	0.782653	1
AM-126 - AM-139	-2.02475	0.0428926	1	0.85172	0.394369	1
AM-127 - AM-139	-3.07864	0.0020795	0.79021	-0.00884102	0.992946	1
AM-128 - AM-139	-0.01839	0.985328	0.985328	0.383747	0.701166	1
AM-129 - AM-139	1.03659	0.299928	1	1.4056	0.159844	1
AM-130 - AM-139	-0.774614	0.438568	1	0.110883	0.911709	1
AM-131 - AM-139	-2.88956	0.00385781	1	3.68295	0.000230549	0.105592
AM-132 - AM-139	0.695141	0.486967	1	1.35108	0.176669	1
AM-133 - AM-139	-2.82463	0.00473347	1	0.416548	0.677009	1
AM-134 - AM-139	-2.96519	0.00302495	1	1.70043	0.0890504	1
AM-135 - AM-139	0.896661	0.3699	1	2.71487	0.00663014	1
AM-136 - AM-139	0.0553901	0.955828	1	2.5187	0.0117788	1
AM-137 - AM-139	1.10517	0.269088	1	2.33406	0.0195924	1
AM-138 - AM-139	-1.30952	0.190358	1	-0.801905	0.422608	1
AM-122 - AM-140	1.85107	0.0641594	1	0.909362	0.363159	1
AM-123 - AM-140	-2.83662	0.00455945	1	0.79393	0.427236	1
AM-124 - AM-140	3.39847	0.000677647	0.279868	5.36827	7.94936e-08	3.89518e-05
AM-125 - AM-140	1.50149	0.133229	1	1.21949	0.22266	1
AM-126 - AM-140	-0.352609	0.724382	1	2.35471	0.018537	1
AM-127 - AM-140	-1.72746	0.0840852	1	1.18706	0.235204	1
AM-128 - AM-140	1.30198	0.192925	1	1.4663	0.142566	1
AM-129 - AM-140	2.68812	0.00718553	1	2.77042	0.00559847	1
AM-130 - AM-140	0.888848	0.374085	1	1.49821	0.13408	1
AM-131 - AM-140	-1.20804	0.227032	1	5.43397	5.51148e-08	2.70614e-05
AM-132 - AM-140	2.03891	0.0414594	1	2.46536	0.0136875	1
AM-133 - AM-140	-1.46308	0.143444	1	1.62982	0.10314	1
AM-134 - AM-140	-1.34912	0.177298	1	3.25403	0.00113782	0.497227
AM-135 - AM-140	2.41016	0.0159455	1	4.02199	5.77083e-05	0.0270075
AM-136 - AM-140	1.65995	0.0969243	1	3.93681	8.25717e-05	0.0384784
AM-137 - AM-140	2.75998	0.00578044	1	3.74333	0.000181595	0.0837155
AM-138 - AM-140	0.40527	0.685279	1	0.602488	0.546849	1
AM-139 - AM-140	1.9337	0.0531501	1	1.56628	0.117284	1
AM-122 - AM-141	2.03701	0.0416493	1	0.498106	0.618409	1
AM-123 - AM-141	-2.52352	0.0116186	1	-0.341134	0.733003	1
AM-124 - AM-141	3.99829	6.38029e-05	0.0288389	4.57199	4.83124e-06	0.00231899
AM-125 - AM-141	1.97006	0.048831	1	0.284525	0.776008	1
AM-126 - AM-141	0.0206618	0.983515	1	1.50269	0.13292	1
AM-127 - AM-141	-1.45752	0.144973	1	0.450121	0.652623	1
AM-128 - AM-141	1.60893	0.107631	1	0.813403	0.415987	1
AM-129 - AM-141	3.11391	0.00184623	0.710799	2.01901	0.0434857	1
AM-130 - AM-141	1.28679	0.198166	1	0.656358	0.511594	1
AM-131 - AM-141	-0.854815	0.392654	1	4.67842	2.89087e-06	0.00139629
AM-132 - AM-141	2.36106	0.0182228	1	1.83307	0.0667929	1
AM-133 - AM-141	-1.18628	0.235513	1	0.904382	0.365793	1
AM-134 - AM-141	-1.01473	0.310237	1	2.43708	0.0148062	1
AM-135 - AM-141	2.78759	0.00531019	1	3.3587	0.000783105	0.347699
AM-136 - AM-141	2.0541	0.0399659	1	3.22131	0.00127608	0.555095
AM-137 - AM-141	3.18799	0.00143267	0.565904	3.02187	0.00251215	1
AM-138 - AM-141	0.808107	0.419029	1	-0.317894	0.750565	1
AM-139 - AM-141	2.44248	0.0145869	1	0.613348	0.539646	1
AM-140 - AM-141	0.457417	0.647372	1	-1.11555	0.264613	1
AM-122 - AM-142	0.131615	0.895289	1	-0.339791	0.734014	1
AM-123 - AM-142	-5.57922	2.41606e-08	1.19112e-05	-1.95823	0.0502025	1
AM-124 - AM-142	-0.597641	0.55008	1	1.78894	0.0736248	1
AM-125 - AM-142	-1.92452	0.0542894	1	-1.33681	0.181284	1
AM-126 - AM-142	-3.33056	0.000866711	0.350151	-0.339561	0.734187	1
AM-127 - AM-142	-4.14392	3.41417e-05	0.015671	-0.944167	0.345085	1
AM-128 - AM-142	-1.28996	0.197063	1	-0.509686	0.610271	1
AM-129 - AM-142	-0.555954	0.578242	1	0.24658	0.805233	1
AM-130 - AM-142	-2.20972	0.0271244	1	-0.940684	0.346867	1
AM-131 - AM-142	-4.09388	4.24215e-05	0.0193442	2.03747	0.0416025	1
AM-132 - AM-142	-0.638603	0.523081	1	0.373367	0.708875	1
AM-133 - AM-142	-3.91638	8.9887e-05	0.0400896	-0.563101	0.573366	1
AM-134 - AM-142	-4.13996	3.47366e-05	0.0159093	0.39089	0.695878	1
AM-135 - AM-142	-0.582825	0.560011	1	1.49575	0.134718	1
AM-136 - AM-142	-1.42129	0.155233	1	1.22825	0.219354	1
AM-137 - AM-142	-0.495474	0.620266	1	1.06541	0.28669	1
AM-138 - AM-142	-2.71499	0.00662784	1	-1.76278	0.0779384	1
AM-139 - AM-142	-1.66698	0.0955185	1	-1.126	0.260165	1
AM-140 - AM-142	-3.34869	0.000811937	0.329647	-2.47744	0.013233	1
AM-141 - AM-142	-3.79482	0.000147753	0.064568	-1.71702	0.0859761	1
AM-122 - AM-143	1.56557	0.117449	1	0.862916	0.388184	1
AM-123 - AM-143	-3.99245	6.53929e-05	0.0294922	0.702695	0.482246	1
AM-124 - AM-143	2.85914	0.00424796	1	5.62069	1.90191e-08	9.37642e-06
AM-125 - AM-143	0.862137	0.388612	1	1.16166	0.245375	1
AM-126 - AM-143	-1.07639	0.281754	1	2.36329	0.0181133	1
AM-127 - AM-143	-2.36278	0.0181383	1	1.12789	0.259367	1
AM-128 - AM-143	0.837922	0.402075	1	1.41792	0.156216	1
AM-129 - AM-143	2.19199	0.0283804	1	2.78352	0.00537731	1
AM-130 - AM-143	0.271091	0.786321	1	1.45421	0.145889	1
AM-131 - AM-143	-2.02238	0.0431375	1	5.64831	1.6203e-08	8.00428e-06
AM-132 - AM-143	1.59753	0.110147	1	2.44772	0.0143762	1
AM-133 - AM-143	-2.08812	0.0367872	1	1.58788	0.112313	1
AM-134 - AM-143	-2.13171	0.0330303	1	3.31569	0.000914186	0.403156
AM-135 - AM-143	1.93589	0.0528807	1	4.07317	4.63779e-05	0.0218904
AM-136 - AM-143	1.11624	0.264321	1	4.00389	6.23096e-05	0.0290986
AM-137 - AM-143	2.26718	0.0233795	1	3.80146	0.000143847	0.0667452
AM-138 - AM-143	-0.273777	0.784256	1	0.507649	0.611699	1
AM-139 - AM-143	1.30264	0.192699	1	1.53337	0.125186	1
AM-140 - AM-143	-0.837304	0.402422	1	-0.155319	0.87657	1
AM-141 - AM-143	-1.39127	0.164144	1	1.05433	0.291733	1
AM-142 - AM-143	2.88313	0.00393746	1	2.47698	0.01325	1
AM-122 - AM-144	3.04194	0.00235057	0.886163	-0.738938	0.459945	1
AM-123 - AM-144	0.539083	0.58983	1	-2.97518	0.00292813	1
AM-124 - AM-144	5.44959	5.04867e-08	2.4789e-05	1.07266	0.283423	1
AM-125 - AM-144	3.7854	0.00015346	0.0669085	-2.19979	0.0278219	1
AM-126 - AM-144	2.14132	0.0322484	1	-1.12295	0.261461	1
AM-127 - AM-144	0.560296	0.575278	1	-1.64104	0.100789	1
AM-128 - AM-144	3.11048	0.00186785	0.715387	-1.12875	0.259005	1
AM-129 - AM-144	4.60734	4.07862e-06	0.0019455	-0.445843	0.655711	1
AM-130 - AM-144	3.12365	0.0017862	0.693047	-1.72432	0.0846506	1
AM-131 - AM-144	1.49543	0.134802	1	1.3621	0.173167	1
AM-132 - AM-144	3.7832	0.000154825	0.0673487	-0.216733	0.828416	1
AM-133 - AM-144	0.796759	0.425591	1	-1.24503	0.213122	1
AM-134 - AM-144	1.28945	0.197242	1	-0.354167	0.723214	1
AM-135 - AM-144	4.2611	2.03427e-05	0.00950003	0.894596	0.371003	1
AM-136 - AM-144	3.70352	0.000212625	0.0916416	0.579475	0.562269	1
AM-137 - AM-144	4.67051	3.0046e-06	0.00144221	0.409398	0.682248	1
AM-138 - AM-144	2.78919	0.00528399	1	-2.62083	0.00877148	1
AM-139 - AM-144	4.19641	2.71185e-05	0.0125287	-1.99978	0.0455242	1
AM-140 - AM-144	2.71804	0.00656705	1	-3.48928	0.00048433	0.21698
AM-141 - AM-144	2.44669	0.0144176	1	-2.71731	0.00658148	1
AM-142 - AM-144	5.18801	2.12553e-07	0.000104151	-0.703387	0.481814	1
AM-143 - AM-144	3.52676	0.00042067	0.17542	-3.5507	0.000384212	0.172895
AM-122 - AM-145	1.10011	0.271284	1	-1.40963	0.158648	1
AM-123 - AM-145	-4.24495	2.18642e-05	0.0101669	-4.87474	1.08954e-06	0.000527337
AM-124 - AM-145	1.46587	0.142683	1	-0.301634	0.762931	1
AM-125 - AM-145	-0.148959	0.881586	1	-3.77004	0.000163223	0.0755724
AM-126 - AM-145	-1.79212	0.0731135	1	-2.55386	0.0106537	1
AM-127 - AM-145	-2.86943	0.0041121	1	-2.868	0.00413073	1
AM-128 - AM-145	0.119068	0.905222	1	-2.20847	0.0272115	1
AM-129 - AM-145	1.1771	0.239156	1	-1.69617	0.0898528	1
AM-130 - AM-145	-0.583985	0.55923	1	-3.13396	0.00172464	0.741596
AM-131 - AM-145	-2.62241	0.00873106	1	0.0772398	0.938433	1
AM-132 - AM-145	0.821704	0.411245	1	-1.2559	0.209151	1
AM-133 - AM-145	-2.62018	0.0087884	1	-2.45057	0.0142632	1
AM-134 - AM-145	-2.70785	0.00677202	1	-1.72744	0.0840879	1
AM-135 - AM-145	1.03155	0.302281	1	-0.195204	0.845233	1
AM-136 - AM-145	0.217097	0.828133	1	-0.607113	0.543776	1
AM-137 - AM-145	1.2442	0.213427	1	-0.787763	0.430835	1
AM-138 - AM-145	-1.09568	0.273219	1	-4.16404	3.12667e-05	0.0148829
AM-139 - AM-145	0.191123	0.848429	1	-3.60347	0.000313995	0.143181
AM-140 - AM-145	-1.66466	0.0959797	1	-5.34935	8.82683e-08	4.31632e-05
AM-141 - AM-145	-2.14019	0.0323396	1	-4.59021	4.42798e-06	0.00213429
AM-142 - AM-145	1.79387	0.0728332	1	-1.96973	0.0488692	1
AM-143 - AM-145	-1.03585	0.300272	1	-5.55824	2.72513e-08	1.34077e-05
AM-144 - AM-145	-3.92331	8.73401e-05	0.039041	-1.29059	0.196847	1
AM-122 - AM-146	0.199546	0.841836	1	-1.66915	0.0950876	1
AM-123 - AM-146	-6.14314	8.09044e-10	4.00477e-07	-5.2943	1.19471e-07	5.83017e-05
AM-124 - AM-146	-0.523929	0.600328	1	-0.877289	0.38033	1
AM-125 - AM-146	-1.98628	0.0470019	1	-4.2011	2.65626e-05	0.0126969
AM-126 - AM-146	-3.51909	0.000433036	0.180143	-3.01391	0.00257907	1
AM-127 - AM-146	-4.32475	1.52705e-05	0.00717712	-3.26355	0.00110024	0.483007
AM-128 - AM-146	-1.26497	0.205883	1	-2.58584	0.00971431	1
AM-129 - AM-146	-0.482409	0.629515	1	-2.14541	0.0319201	1
AM-130 - AM-146	-2.28078	0.0225616	1	-3.56213	0.000367856	0.165903
AM-131 - AM-146	-4.37586	1.20953e-05	0.00569689	-0.484273	0.628192	1
AM-132 - AM-146	-0.575631	0.564864	1	-1.6513	0.0986772	1
AM-133 - AM-146	-4.08123	4.47987e-05	0.0203386	-2.85571	0.00429401	1
AM-134 - AM-146	-4.40574	1.05424e-05	0.00498656	-2.21374	0.0268468	1
AM-135 - AM-146	-0.513454	0.607634	1	-0.652208	0.514267	1
AM-136 - AM-146	-1.41708	0.156461	1	-1.08509	0.277882	1
AM-137 - AM-146	-0.417083	0.676618	1	-1.26097	0.207319	1
AM-138 - AM-146	-2.84476	0.00444451	1	-4.57296	4.80881e-06	0.00231304
AM-139 - AM-146	-1.7078	0.0876734	1	-4.04845	5.15576e-05	0.0242321
AM-140 - AM-146	-3.6025	0.000315168	0.133316	-5.74205	9.35362e-09	4.63004e-06
AM-141 - AM-146	-4.13007	3.62654e-05	0.0165733	-5.02217	5.10901e-07	0.000248809
AM-142 - AM-146	0.11809	0.905997	1	-2.41175	0.0158763	1
AM-143 - AM-146	-3.11216	0.00185722	0.713172	-5.95056	2.67226e-09	1.32544e-06
AM-144 - AM-146	-5.52235	3.34502e-08	1.64575e-05	-1.77272	0.0762746	1
AM-145 - AM-146	-1.84238	0.0654203	1	-0.558894	0.576234	1
AM-122 - AM-147	0.696923	0.485851	1	-1.00682	0.314022	1
AM-123 - AM-147	-4.70454	2.54438e-06	0.00122639	-3.57418	0.000351327	0.1588
AM-124 - AM-147	0.544626	0.58601	1	0.512351	0.608405	1
AM-125 - AM-147	-0.904637	0.365658	1	-2.73555	0.00622768	1
AM-126 - AM-147	-2.41142	0.0158904	1	-1.64302	0.100379	1
AM-127 - AM-147	-3.36367	0.000769125	0.313803	-2.08929	0.0366816	1
AM-128 - AM-147	-0.4716	0.637212	1	-1.53794	0.124063	1
AM-129 - AM-147	0.424371	0.671296	1	-0.923677	0.355655	1
AM-130 - AM-147	-1.26348	0.206418	1	-2.22547	0.0260495	1
AM-131 - AM-147	-3.19461	0.00140021	0.555884	0.826339	0.408612	1
AM-132 - AM-147	0.201123	0.840602	1	-0.625926	0.531364	1
AM-133 - AM-147	-3.12721	0.00176474	0.686484	-1.69327	0.0904032	1
AM-134 - AM-147	-3.26329	0.00110126	0.440506	-0.874241	0.381987	1
AM-135 - AM-147	0.337127	0.736021	1	0.446348	0.655346	1
AM-136 - AM-147	-0.479441	0.631625	1	0.101641	0.919042	1
AM-137 - AM-147	0.48754	0.625876	1	-0.0684355	0.945439	1
AM-138 - AM-147	-1.76355	0.0778078	1	-3.14091	0.00168424	0.725908
AM-139 - AM-147	-0.609456	0.542222	1	-2.54877	0.0108104	1
AM-140 - AM-147	-2.34779	0.0188854	1	-4.06796	4.74262e-05	0.0223377
AM-141 - AM-147	-2.79694	0.00515894	1	-3.31631	0.000912155	0.403173
AM-142 - AM-147	1.00505	0.314875	1	-1.18122	0.237515	1
AM-143 - AM-147	-1.80727	0.0707197	1	-4.16002	3.18217e-05	0.0151153
AM-144 - AM-147	-4.38713	1.14856e-05	0.00542119	-0.501156	0.616261	1
AM-145 - AM-147	-0.766728	0.443243	1	0.754829	0.450351	1
AM-146 - AM-147	0.969606	0.332243	1	1.25265	0.210334	1
AM-122 - AM-148	2.1326	0.0329574	1	-0.482882	0.62918	1
AM-123 - AM-148	-1.74351	0.0812439	1	-2.62948	0.00855159	1
AM-124 - AM-148	3.77459	0.000160269	0.0695566	1.77064	0.0766198	1
AM-125 - AM-148	2.04129	0.0412224	1	-1.8041	0.0712155	1
AM-126 - AM-148	0.323856	0.746047	1	-0.654581	0.512737	1
AM-127 - AM-148	-1.0811	0.279651	1	-1.26282	0.206653	1
AM-128 - AM-148	1.73667	0.0824453	1	-0.75653	0.449331	1
AM-129 - AM-148	3.09807	0.00194785	0.744078	0.0280653	0.97761	1
AM-130 - AM-148	1.44379	0.148799	1	-1.31386	0.188894	1
AM-131 - AM-148	-0.432164	0.665622	1	2.04318	0.041035	1
AM-132 - AM-148	2.43931	0.0147154	1	0.196037	0.844581	1
AM-133 - AM-148	-0.83185	0.405494	1	-0.845385	0.397896	1
AM-134 - AM-148	-0.591875	0.553934	1	0.171831	0.863571	1
AM-135 - AM-148	2.81988	0.00480414	1	1.40998	0.158547	1
AM-136 - AM-148	2.13807	0.0325112	1	1.11713	0.26394	1
AM-137 - AM-148	3.16517	0.00154993	0.607575	0.936477	0.349028	1
AM-138 - AM-148	1.0203	0.307587	1	-2.26476	0.0235272	1
AM-139 - AM-148	2.44487	0.0144906	1	-1.58054	0.113983	1
AM-140 - AM-148	0.734628	0.462566	1	-3.19578	0.00139454	0.603834
AM-141 - AM-148	0.361248	0.717914	1	-2.34495	0.0190295	1
AM-142 - AM-148	3.71485	0.000203327	0.0880406	-0.245491	0.806077	1
AM-143 - AM-148	1.51839	0.128916	1	-3.26558	0.0010924	0.480655
AM-144 - AM-148	-1.89554	0.058021	1	0.529516	0.596448	1
AM-145 - AM-148	2.19024	0.0285065	1	1.96594	0.049306	1
AM-146 - AM-148	3.95835	7.54685e-05	0.0339608	2.45817	0.0139647	1
AM-147 - AM-148	2.7945	0.00519799	1	1.06527	0.286752	1
AM-122 - AM-149	2.60557	0.00917206	1	-0.739959	0.459325	1
AM-123 - AM-149	-0.716532	0.473663	1	-3.46623	0.000527815	0.235933
AM-124 - AM-149	5.05626	4.27549e-07	0.000208217	1.28795	0.197764	1
AM-125 - AM-149	3.1442	0.0016654	0.649507	-2.45804	0.0139696	1
AM-126 - AM-149	1.29543	0.195172	1	-1.22296	0.221345	1
AM-127 - AM-149	-0.323281	0.746482	1	-1.75322	0.079564	1
AM-128 - AM-149	2.50124	0.0123761	1	-1.17894	0.238421	1
AM-129 - AM-149	4.0841	4.42474e-05	0.0201326	-0.452607	0.650832	1
AM-130 - AM-149	2.42162	0.0154516	1	-1.88511	0.059415	1
AM-131 - AM-149	0.536957	0.591297	1	1.59734	0.11019	1
AM-132 - AM-149	3.22386	0.00126477	0.503378	-0.199284	0.84204	1
AM-133 - AM-149	-0.0652779	0.947953	1	-1.32113	0.186457	1
AM-134 - AM-149	0.33372	0.738591	1	-0.355052	0.72255	1
AM-135 - AM-149	3.71462	0.000203507	0.0879149	1.01339	0.310875	1
AM-136 - AM-149	3.0849	0.0020362	0.775791	0.680925	0.495919	1
AM-137 - AM-149	4.15394	3.268e-05	0.0150655	0.492898	0.622085	1
AM-138 - AM-149	2.02684	0.0426788	1	-2.91399	0.00356843	1
AM-139 - AM-149	3.61021	0.000305955	0.130031	-2.24587	0.0247122	1
AM-140 - AM-149	1.88263	0.0597507	1	-4.02306	5.74478e-05	0.026943
AM-141 - AM-149	1.54057	0.123421	1	-3.16111	0.0015717	0.678973
AM-142 - AM-149	4.72606	2.28915e-06	0.00110566	-0.737333	0.46092	1
AM-143 - AM-149	2.81484	0.00488019	1	-4.1754	2.97461e-05	0.0141889
AM-144 - AM-149	-1.07073	0.284289	1	0.0427355	0.965912	1
AM-145 - AM-149	3.30122	0.000962658	0.387951	1.51592	0.129539	1
AM-146 - AM-149	5.11241	3.18068e-07	0.000155217	2.04608	0.0407482	1
AM-147 - AM-149	3.83423	0.00012596	0.0554224	0.603045	0.546479	1
AM-148 - AM-149	0.992498	0.320955	1	-0.556355	0.577968	1
AM-122 - AM-150	0.660104	0.509187	1	-0.529505	0.596455	1
AM-123 - AM-150	-5.88429	3.99775e-09	1.97489e-06	-3.00298	0.00267353	1
AM-124 - AM-150	0.498792	0.617926	1	1.82869	0.0674455	1
AM-125 - AM-150	-1.18768	0.234961	1	-2.02928	0.0424294	1
AM-126 - AM-150	-2.90572	0.00366409	1	-0.785232	0.432318	1
AM-127 - AM-150	-3.8271	0.000129659	0.0569204	-1.39447	0.163176	1
AM-128 - AM-150	-0.609172	0.542411	1	-0.849097	0.395827	1
AM-129 - AM-150	0.359061	0.719549	1	-0.0461236	0.963212	1
AM-130 - AM-150	-1.56206	0.118274	1	-1.47864	0.139235	1
AM-131 - AM-150	-3.84925	0.000118482	0.0523691	2.1106	0.0348068	1
AM-132 - AM-150	0.12115	0.903572	1	0.141003	0.887868	1
AM-133 - AM-150	-3.56568	0.000362908	0.152784	-0.956657	0.33874	1
AM-134 - AM-150	-3.88595	0.00010193	0.0451549	0.0993889	0.920829	1
AM-135 - AM-150	0.264284	0.791561	1	1.40879	0.158899	1
AM-136 - AM-150	-0.655633	0.51206	1	1.10498	0.269167	1
AM-137 - AM-150	0.42998	0.66721	1	0.914041	0.360695	1
AM-138 - AM-150	-2.16022	0.0307554	1	-2.50883	0.0121132	1
AM-139 - AM-150	-0.855497	0.392276	1	-1.79965	0.0719163	1
AM-140 - AM-150	-2.96389	0.00303774	1	-3.59238	0.000327672	0.149091
AM-141 - AM-150	-3.56298	0.000366663	0.153999	-2.68918	0.00716279	1
AM-142 - AM-150	1.01097	0.312029	1	-0.335264	0.737426	1
AM-143 - AM-150	-2.38144	0.0172452	1	-3.72392	0.000196151	0.0902294
AM-144 - AM-150	-5.11551	3.12902e-07	0.000153009	0.482926	0.629148	1
AM-145 - AM-150	-1.02739	0.304237	1	2.02748	0.0426129	1
AM-146 - AM-150	0.984776	0.324734	1	2.54677	0.0108726	1
AM-147 - AM-150	-0.124736	0.900732	1	1.05304	0.292324	1
AM-148 - AM-150	-3.38421	0.000713826	0.293382	-0.0879716	0.929899	1
AM-149 - AM-150	-4.67646	2.9187e-06	0.0014039	0.510436	0.609746	1
AM-122 - AM-151	2.64127	0.00825961	1	0.464248	0.64247	1
AM-123 - AM-151	-0.356851	0.721204	1	-0.284777	0.775815	1
AM-124 - AM-151	4.61152	3.99738e-06	0.00191075	3.58931	0.00033156	0.150528
AM-125 - AM-151	2.98405	0.00284456	1	0.206585	0.836334	1
AM-126 - AM-151	1.36343	0.172747	1	1.21298	0.225137	1
AM-127 - AM-151	-0.11016	0.912283	1	0.372274	0.709689	1
AM-128 - AM-151	2.49844	0.0124742	1	0.709151	0.478231	1
AM-129 - AM-151	3.89263	9.91643e-05	0.0441281	1.70036	0.0890634	1
AM-130 - AM-151	2.37406	0.0175936	1	0.526639	0.598445	1
AM-131 - AM-151	0.694085	0.487629	1	3.76847	0.000164251	0.0758838
AM-132 - AM-151	3.17116	0.00151831	0.596695	1.62116	0.104982	1
AM-133 - AM-151	0.126304	0.899491	1	0.768289	0.442315	1
AM-134 - AM-151	0.511562	0.608958	1	1.98176	0.0475061	1
AM-135 - AM-151	3.59064	0.000329866	0.139204	2.90791	0.00363851	1
AM-136 - AM-151	2.98882	0.00280061	1	2.72568	0.00641698	1
AM-137 - AM-151	3.9558	7.62798e-05	0.0342496	2.5556	0.0106005	1
AM-138 - AM-151	2.0113	0.0442935	1	-0.284908	0.775715	1
AM-139 - AM-151	3.37527	0.000737438	0.301612	0.46602	0.641201	1
AM-140 - AM-151	1.85248	0.0639566	1	-0.890097	0.373414	1
AM-141 - AM-151	1.55075	0.120961	1	-0.0269041	0.978536	1
AM-142 - AM-151	4.4733	7.70207e-06	0.00366619	1.44281	0.149073	1
AM-143 - AM-151	2.61538	0.00891275	1	-0.813901	0.415702	1
AM-144 - AM-151	-0.749592	0.4535	1	2.25096	0.0243883	1
AM-145 - AM-151	3.12196	0.00179649	0.695241	3.69696	0.000218196	0.100152
AM-146 - AM-151	4.74446	2.09065e-06	0.00101187	4.10865	3.97978e-05	0.0188641
AM-147 - AM-151	3.63754	0.000275256	0.117809	2.75211	0.00592123	1
AM-148 - AM-151	1.09419	0.273871	1	1.87686	0.0605376	1
AM-149 - AM-151	0.232665	0.816021	1	2.47391	0.0133644	1
AM-150 - AM-151	4.26277	2.01904e-05	0.00944912	2.07775	0.0377328	1
AM-122 - AM-152	2.4869	0.0128861	1	-0.311012	0.755791	1
AM-123 - AM-152	-0.702026	0.482663	1	-2.01831	0.0435587	1
AM-124 - AM-152	4.28864	1.79774e-05	0.00843139	1.96773	0.0490989	1
AM-125 - AM-152	2.67532	0.00746578	1	-1.34394	0.178969	1
AM-126 - AM-152	1.06373	0.28745	1	-0.292148	0.770173	1
AM-127 - AM-152	-0.368466	0.712526	1	-0.924986	0.354973	1
AM-128 - AM-152	2.26264	0.023658	1	-0.475079	0.63473	1
AM-129 - AM-152	3.61727	0.000297724	0.12683	0.317476	0.750883	1
AM-130 - AM-152	2.08527	0.037045	1	-0.923741	0.355621	1
AM-131 - AM-152	0.385351	0.699978	1	2.21795	0.0265583	1
AM-132 - AM-152	2.93536	0.00333159	1	0.436934	0.662159	1
AM-133 - AM-152	-0.132002	0.894983	1	-0.52897	0.596826	1
AM-134 - AM-152	0.211865	0.832212	1	0.47663	0.633626	1
AM-135 - AM-152	3.33233	0.000861206	0.348788	1.61065	0.107255	1
AM-136 - AM-152	2.71346	0.00665845	1	1.34279	0.179339	1
AM-137 - AM-152	3.68044	0.00023283	0.100117	1.17272	0.240909	1
AM-138 - AM-152	1.71161	0.0869692	1	-1.79004	0.0734478	1
AM-139 - AM-152	3.05891	0.00222144	0.839705	-1.12279	0.261526	1
AM-140 - AM-152	1.51901	0.12876	1	-2.56485	0.010322	1
AM-141 - AM-152	1.20558	0.227981	1	-1.76044	0.0783333	1
AM-142 - AM-152	4.19795	2.69345e-05	0.0124707	0.0599317	0.95221	1
AM-143 - AM-152	2.26426	0.0235584	1	-2.57733	0.00995676	1
AM-144 - AM-152	-1.03839	0.29909	1	0.800576	0.423377	1
AM-145 - AM-152	2.81323	0.00490466	1	2.14644	0.0318379	1
AM-146 - AM-152	4.44476	8.79893e-06	0.00417949	2.60352	0.00922719	1
AM-147 - AM-152	3.34874	0.000811788	0.330398	1.30173	0.193008	1
AM-148 - AM-152	0.785457	0.432186	1	0.326336	0.74417	1
AM-149 - AM-152	-0.0902171	0.928115	1	0.852335	0.394028	1
AM-150 - AM-152	3.93424	8.34591e-05	0.0373897	0.427803	0.668794	1
AM-151 - AM-152	-0.288795	0.772738	1	-1.45038	0.146953	1
AM-122 - AM-153	1.84211	0.0654585	1	-0.604551	0.545477	1
AM-123 - AM-153	-2.30693	0.0210587	1	-2.80794	0.00498602	1
AM-124 - AM-153	3.0393	0.00237128	0.891601	1.43215	0.1521	1
AM-125 - AM-153	1.40659	0.159549	1	-2.00207	0.0452773	1
AM-126 - AM-153	-0.23395	0.815024	1	-0.884709	0.376314	1
AM-127 - AM-153	-1.52318	0.127714	1	-1.44777	0.147682	1
AM-128 - AM-153	1.27969	0.200655	1	-0.936566	0.348982	1
AM-129 - AM-153	2.5165	0.0118528	1	-0.201727	0.84013	1
AM-130 - AM-153	0.875479	0.381314	1	-1.51646	0.129402	1
AM-131 - AM-153	-0.982989	0.325613	1	1.71475	0.0863904	1
AM-132 - AM-153	1.96902	0.0489503	1	-0.0020305	0.99838	1
AM-133 - AM-153	-1.27965	0.200667	1	-1.03993	0.298374	1
AM-134 - AM-153	-1.1206	0.262457	1	-0.0845388	0.932628	1
AM-135 - AM-153	2.28812	0.0221306	1	1.16358	0.244595	1
AM-136 - AM-153	1.58183	0.113689	1	0.858595	0.390564	1
AM-137 - AM-153	2.58182	0.00982803	1	0.682712	0.494789	1
AM-138 - AM-153	0.440377	0.659664	1	-2.44376	0.014535	1
AM-139 - AM-153	1.77661	0.075632	1	-1.7901	0.0734386	1
AM-140 - AM-153	0.0896713	0.928548	1	-3.34904	0.000810923	0.359239
AM-141 - AM-153	-0.293857	0.768867	1	-2.5358	0.0112189	1
AM-142 - AM-153	3.11699	0.00182705	0.705241	-0.468063	0.639739	1
AM-143 - AM-153	0.797931	0.424911	1	-3.41631	0.000634766	0.282471
AM-144 - AM-153	-2.36609	0.0179771	1	0.272945	0.784896	1
AM-145 - AM-153	1.5505	0.121022	1	1.64013	0.100977	1
AM-146 - AM-153	3.28514	0.00101933	0.408752	2.1292	0.0332378	1
AM-147 - AM-153	2.18665	0.0287681	1	0.793019	0.427767	1
AM-148 - AM-153	-0.565479	0.571748	1	-0.259142	0.795526	1
AM-149 - AM-153	-1.54918	0.121338	1	0.263357	0.792275	1
AM-150 - AM-153	2.64708	0.00811905	1	-0.19285	0.847076	1
AM-151 - AM-153	-1.5882	0.112241	1	-2.06298	0.0391143	1
AM-152 - AM-153	-1.28851	0.19757	1	-0.557852	0.576945	1
