# Supplementary material for: Human-Camelid Interactions in the Wari Hinterlands: A stable isotopic analysis of camelid remains from Auquimarca (600-1000 CE), Huancayo, Peru
Source: Research Square preprint supplement (doi:10.21203/rs.3.rs-8099994/v1), 2025-12-01
Supplement: Supplementary file 3 [file 5a248f37fdd6be76b43df72c.xlsx]

## Sheet: Sheet1
Site Name	Lab Code	Sample Code	Unit or Tomb	Element (Mx= maxillary, Md= mandibular)	Tooth: Mx or Md	Tooth section (OCC, CEJ, BULK)	δ13C enam VPDB	δ18O enam VPDB
Auquimarca	6730	AM-122	Tomb 3 (T3)	Mx M2	Mx	BULK	-1.26135	-7.06931
Auquimarca	6562	AM-123	A21	Md M2	Md	CEJ	-15.0784	-7.49217		Authors: Baker, Alaica, Locker, Krause, González, Palacios, Arambúru, & Tung
Auquimarca	6563					MID 1	-10.4429	-7.28945		Title: Human-Camelid Interactions in the Wari Hinterlands: A stable isotopic analysis of camelid remains from Auquimarca (600-1000 CE), Huancayo, Peru
Auquimarca	6604					MID 2	-9.84522	-9.55807		Journal Name: Archaeological and Anthropological Sciences
Auquimarca	6605					MID 3	-10.1975	-8.62603		Corresponding Author: Lilian Baker, Vanderbilt University (lilian.j.baker@vanderbilt.edu)
Auquimarca	6606					MID 4	-11.1358	-9.04415
Auquimarca	6607					MID 5	-11.3254	-8.18096
Auquimarca	6608					OCC	-11.2532	-8.19593
Auquimarca	6554			Md dP4	Md	CEJ	-12.5049	-9.0055
Auquimarca	6555					MID 1	-13.845	-10.7747
Auquimarca	6556					OCC	-12.1168	-10.3938
Auquimarca	6557			Md M1	Md	CEJ	-9.78741	-5.4299
Auquimarca	6558					MID 1	-10.4318	-7.08072
Auquimarca	6559					MID 2	-13.8692	-7.05362
Auquimarca	6560					MID 3	-14.6746	-7.58048
Auquimarca	6561					OCC	-15.1016	-8.96034
Auquimarca	6676	AM-124	A7	Md M1	Md	CEJ	-3.61665	-4.43387
Auquimarca	6677					MID 1	-3.66209	-3.69634
Auquimarca	6678					MID 2	-4.69242	-4.80816
Auquimarca	6679					MID 3	-5.0439	-4.2293
Auquimarca	6680					MID 4	-5.86034	-4.80417
Auquimarca	6681					MID 5	-6.54924	-5.32714
Auquimarca	6682					MID 6	-6.73502	-4.33808
Auquimarca	6683					OCC	-6.67878	-5.27524
Auquimarca	6674			Md dP4	Md	CEJ	-2.64701	-3.33941
Auquimarca	6675				Md	OCC	-1.9263	-3.07654
Auquimarca	6600	AM-125	B3	Md M3	Md	BULK	-2.03064	-9.80356
Auquimarca	6593			Md M1	Md	MID 1	-7.66653	-10.6218
Auquimarca	6594				Md	MID 2	-9.35549	-5.03056
Auquimarca	6595				Md	OCC	-9.34747	-5.28702
Auquimarca	6596			Md M2	Md	CEJ	-5.34133	-9.46527
Auquimarca	6597				Md	MID 1	-8.21748	-7.22396
Auquimarca	6598				Md	MID 2	-7.98365	-8.36058
Auquimarca	6599				Md	OCC	-9.09056	-7.15411
Auquimarca	6552	AM-126	A27	Md M1	Md M1	CEJ	-10.2485	-6.11933
Auquimarca	6634			Md M2	Md	CEJ	-9.45136	-6.3515
Auquimarca	6635				Md	MID 1	-9.18614	-5.99465
Auquimarca	6636				Md	MID 2	-9.59397	-5.84039
Auquimarca	6637				Md	MID 3	-9.67856	-6.90319
Auquimarca	6638				Md	MID 4	-9.23044	-7.64745
Auquimarca	6639				Md	OCC	-9.47414	-7.90288
Auquimarca	6721	AM-127	D14	Mx M1	Mx	CEJ	-11.0207	-9.02182
Auquimarca	6722				Mx	MID 1	-11.3258	-7.74142
Auquimarca	6723				Mx	MID 2	-10.6209	-6.91773
Auquimarca	6734				Mx	OCC	-10.5011	-6.52185
Auquimarca	6670	AM-128	B6	Mx M2	Mx	CEJ	-8.11382	-6.85314
Auquimarca	6671				Mx	MID 1	-6.9921	-6.93298
Auquimarca	6672				Mx	MID 2	-6.68618	-7.51335
Auquimarca	6581	AM-129	B6	Md M2	Md	CEJ	-6.61282	-4.7756
Auquimarca	6582				Md	MID 1	-2.72308	-4.4857
Auquimarca	6583				Md	MID 2	-5.55709	-6.23603
Auquimarca	6584				Md	MID 3	-4.86464	-7.24192
Auquimarca	6585				Md	OCC	-5.30018	-7.32575
Auquimarca	6656	AM-130	Tomb 6 (T6)	Md M3	Md	MID 1	-8.28689	-7.34393
Auquimarca	6657				Md	MID 2	-8.27178	-6.88316
Auquimarca	6658				Md	MID 3	-8.39766	-7.51022
Auquimarca	6659				Md	MID 4	-8.54468	-7.75262
Auquimarca	6660				Md	MID 5	-8.74709	-7.65847
Auquimarca	6661				Md	OCC	-8.53159	-7.11655
Auquimarca	6662	AM-131	Tomb 10 (T10)	Mx M3	Mx	CEJ	-8.88605	-2.39056
Auquimarca	6663				Mx	MID 1	-9.08189	-1.49766
Auquimarca	6664				Mx	MID 2	-9.95657	-3.05959
Auquimarca	6665				Mx	MID 3	-10.2759	-3.50771
Auquimarca	6666				Mx	MID 4	-10.4567	-3.77319
Auquimarca	6667				Mx	MID 5	-10.4366	-4.51873
Auquimarca	6668				Mx	MID 6	-10.6696	-5.17244
Auquimarca	6669				Mx	OCC	-10.8865	-4.71135
Auquimarca	6776	AM-132	C13	Mx M1	Mx	CEJ	-6.14615	-5.35941
Auquimarca	6777				Mx	MID 1	-5.29596	-5.95512
Auquimarca	6778				Mx	OCC	-5.50273	-5.67826
Auquimarca	6684	AM-133	D14	Mx M1	Mx	CEJ	-10.9015	-8.32225
Auquimarca	6686				Mx	MID 2	-11.0853	-7.32122
Auquimarca	6687				Mx	MID 3	-9.78284	-6.38905
Auquimarca	6688				Mx	OCC	-10.541	-6.12357
Auquimarca	6731	AM-134	A26	Mx M3	Mx	CEJ	-9.61299	-8.44644
Auquimarca	6732				Mx	MID 1	-9.80733	-7.04238
Auquimarca	6733				Mx	MID 2	-9.94931	-5.92054
Auquimarca	6764				Mx	MID 3	-10.2055	-4.90938
Auquimarca	6765				Mx	MID 4	-10.4383	-4.76671
Auquimarca	6766				Mx	MID 5	-10.4915	-4.96761
Auquimarca	6767				Mx	OCC	-11.2744	-4.87565
Auquimarca	6700	AM-135	Tomb 11 (T11)	Mx M1	Mx	CEJ	-6.27006	-5.84312
Auquimarca	6701				Mx	MID 1	-5.68488	-4.47161
Auquimarca	6702				Mx	MID 2	-5.12502	-3.52726
Auquimarca	6703				Mx	OCC	-4.26508	-2.43234
Auquimarca	6748	AM-136	C11	Mx M2	Mx	CEJ	-7.94483	-5.85661
Auquimarca	6749				Mx	MID 1	-7.66401	-4.81606
Auquimarca	6750				Mx	MID 2	-7.03794	-4.94149
Auquimarca	6751				Mx	MID 3	-6.85173	-4.73378
Auquimarca	6752				Mx	OCC	-6.39375	-3.42933
Auquimarca	6759	AM-137	C8	Mx M3	Mx	CEJ	-4.03138	-6.49278
Auquimarca	6760				Mx	MID 1	-4.59807	-5.04785
Auquimarca	6761				Mx	MID 2	-5.12751	-4.67458
Auquimarca	6762				Mx	MID 3	-5.69621	-4.63244
Auquimarca	6763				Mx	OCC	-5.93778	-4.43476
Auquimarca	6545	AM-138	A8	Mx M3	Mx M3	CEJ	-9.82567	-11.4341
Auquimarca	6546				Mx M3	Mid 1	-11.3128	-12.2379
Auquimarca	6547				Mx M3	Mid 2	-8.31741	-7.14194
Auquimarca	6548				Mx M3	Mid 3	-8.92958	-7.05663
Auquimarca	6549				Mx M3	Mid 4	-4.9344	-8.67433
Auquimarca	6550				Mx M3	Mid 5	-8.18652	-7.12488
Auquimarca	6551				Mx M3	OCC	-9.31721	-8.4084
Auquimarca	6623	AM-139	D14	Md dP3	Md	BULK	-5.37628	-10.1134
Auquimarca	6651			Md M1	Md	MID 1	-9.48018	-3.61463
Auquimarca	6652				Md	MID 2	-9.47716	-4.57826
Auquimarca	6653				Md	MID 3	-9.39358	-5.36359
Auquimarca	6654				Md	OCC	-8.51951	-6.59467
Auquimarca	6647			Md dP4	Md	CEJ	-5.77242	-9.30224
Auquimarca	6648				Md	MID 1	-5.01113	-9.32628
Auquimarca	6649				Md	MID 2	-4.46332	-9.46552
Auquimarca	6650				Md	OCC	-3.80374	-9.34231
Auquimarca	6614	AM-140	A2	Md M2	Md	CEJ	-9.2857	-9.28997
Auquimarca	6615				Md	MID 1	-9.0307	-9.01448
Auquimarca	6616				Md	MID 2	-9.24755	-8.13814
Auquimarca	6617				Md	OCC	-9.56581	-8.91966
Auquimarca	6601			Md M1	Md	CEJ	-10.052	-7.40059
Auquimarca	6602				Md	MID	-9.92852	-7.38962
Auquimarca	6603				Md	OCC	-9.66358	-8.68091
Auquimarca	6618			Md M3	Md	CEJ	-8.48053	-12.1825
Auquimarca	6619				Md	MID 1	-9.37907	-11.0417
Auquimarca	6620				Md	MID 2	-8.18034	-10.2352
Auquimarca	6621				Md	MID 3	-9.40317	-8.53239
Auquimarca	6622				Md	OCC	-8.82689	-8.65217
Auquimarca	6609	AM-141	D14	Md dP3	Md	BULK	-9.21342	-7.07514
Auquimarca	6610			Md dP4	Md	CEJ	-8.78071	-8.84381
Auquimarca	6611				Md	MID 1	-10.629	-8.38866
Auquimarca	6612				Md	MID 2	-9.23049	-8.33976
Auquimarca	6613				Md	MID 3	-8.61204	-8.36271
Auquimarca	6624				Md	MID 4	-9.62705	-7.2558
Auquimarca	6625				Md	OCC	-7.86108	-7.59815
Auquimarca	6626			Md M1	Md	CEJ	-8.40422	-6.74077
Auquimarca	6627				Md	MID 1	-9.29072	-6.81463
Auquimarca	6628				Md	MID 2	-8.90219	-7.77682
Auquimarca	6629				Md	MID 3	-8.92327	-8.19902
Auquimarca	6630				Md	MID 4	-10.6421	-8.3667
Auquimarca	6631				Md	MID 5	-10.7916	-8.50944
Auquimarca	6632				Md	MID 6	-10.6692	-8.32079
Auquimarca	6633				Md	OCC	-11.7334	-9.10432
Auquimarca	6735	AM-142	Tomb 6 (T6)	Md dP3	Md	CEJ	-2.7748	-5.14073
Auquimarca	6736				Md	MID 1	-2.66806	-5.52864
Auquimarca	6737				Md	MID 2	-2.72646	-6.84793
Auquimarca	6738				Md	MID 3	-2.78327	-6.80384
Auquimarca	6739				Md	OCC	-3.07215	-7.35673
Auquimarca	6564	AM-143	Tomb 6 (T6)	Md M1 or M2	Md	CEJ	-4.81258	-7.85946
Auquimarca	6565				Md	MID 1	-6.31882	-8.07422
Auquimarca	6566				Md	MID 2	-6.43561	-8.39334
Auquimarca	6567				Md	MID 3	-7.1092	-9.40992
Auquimarca	6568				Md	MID 4	-9.58302	-9.35573
Auquimarca	6569				Md	MID 5	-10.4731	-9.12893
Auquimarca	6570				Md	MID 6	-12.8049	-10.0311
Auquimarca	6571				Md	MID 7	-8.28318	-8.79676
Auquimarca	6572				Md	MID 8	-8.95575	-8.85196
Auquimarca	6573				Md	MID 9	-8.16941	-8.34517
Auquimarca	6574				Md	MID 10	-8.94468	-8.68336
Auquimarca	6575				Md	MID 11	-9.47831	-8.22776
Auquimarca	6576				Md	MID 12	-8.85809	-8.56896
Auquimarca	6577				Md	MID 13	-8.22881	-7.80628
Auquimarca	6578				Md	MID 14	-7.96703	-7.87753
Auquimarca	6579				Md	MID 15	-8.63256	-9.01453
Auquimarca	6580				Md	OCC	-9.49039	-8.98744
Auquimarca	6724	AM-144	A21	Md M1	Md	CEJ	-11.5212	-4.54141
Auquimarca	6725				Md	MID 1	-11.787	-5.09785
Auquimarca	6726				Md	MID 2	-12.077	-5.17862
Auquimarca	6727				Md	MID 3	-12.661	-5.69916
Auquimarca	6728				Md	MID 4	-12.8242	-6.13593
Auquimarca	6729				Md	OCC	-13.0668	-5.96441
Auquimarca	6768	AM-145	Tomb 6 (T6)	Mx M2	Mx	CEJ	-7.58255	-5.60429
Auquimarca	6769				Mx	MID 1	-7.69196	-4.25396
Auquimarca	6770				Mx	MID 2	-7.90476	-3.41038
Auquimarca	6771				Mx	MID 3	-7.93989	-3.41637
Auquimarca	6772				Mx	MID 4	-7.55745	-3.82817
Auquimarca	6773				Mx	MID 5	-7.59459	-3.81018
Auquimarca	6774				Mx	MID 6	-7.80438	-3.74421
Auquimarca	6775				Mx	OCC	-7.99711	-3.67725
Auquimarca	6640	AM-146	C11	Md M2	Md	CEJ	-2.3879	-1.7014
Auquimarca	6641				Md	MID 1	-0.941858	0.662597
Auquimarca	6642				Md	MID 2	-2.10997	-0.707719
Auquimarca	6643				Md	MID 3	-2.44027	-0.284003
Auquimarca	6644				Md	MID 4	-3.55199	-1.79155
Auquimarca	6645				Md	MID 5	-4.92755	-3.37022
Auquimarca	6646				Md	OCC	-6.14702	-4.75255
Auquimarca	6753	AM-147	C7	Md M2	Md	CEJ	-5.96295	-4.25214
Auquimarca	6754				Md	MID 1	-6.0475	-4.26318
Auquimarca	6755				Md	MID 2	-6.43099	-4.61738
Auquimarca	6756				Md	MID 3	-6.25686	-5.4121
Auquimarca	6757				Md	MID 4	-6.05655	-5.1492
Auquimarca	6758				Md	OCC	-5.65494	-5.7653
Auquimarca	6740	AM-148	A7	Md M2	Md	CEJ	-9.82607	-5.19235
Auquimarca	6741				Md	MID 1	-9.40735	-4.95754
Auquimarca	6742				Md	MID 2	-9.88646	-4.78696
Auquimarca	6743				Md	MID 3	-9.73447	-5.17328
Auquimarca	6744				Md	MID 4	-9.84016	-6.42656
Auquimarca	6745				Md	MID 5	-9.62778	-7.29452
Auquimarca	6746				Md	MID 6	-9.73246	-7.48517
Auquimarca	6747				Md	OCC	-10.0938	-6.59312
Auquimarca	6711	AM-149	A13	Md M2	Md	CEJ	-9.7266	-3.65226
Auquimarca	6712				Md	MID 1	-10.0679	-3.3584
Auquimarca	6713				Md	MID 2	-10.1296	-3.73069
Auquimarca	6714				Md	MID 3	-10.1004	-3.79252
Auquimarca	6715				Md	MID 4	-10.338	-4.61122
Auquimarca	6716				Md	MID 5	-10.6995	-6.00231
Auquimarca	6717				Md	MID 6	-10.7086	-6.14491
Auquimarca	6718				Md	MID 7	-10.7539	-6.11798
Auquimarca	6719				Md	MID 8	-11.349	-7.85809
Auquimarca	6720				Md	OCC	-11.3157	-8.72565
Auquimarca	6689	AM-150	B5	Md M1	Md	CEJ	-4.94966	-3.33342
Auquimarca	6690				Md	MID 1	-5.19755	-4.01372
Auquimarca	6691				Md	MID 2	-4.93444	-4.36702
Auquimarca	6692				Md	MID 3	-5.306	-4.5856
Auquimarca	6693				Md	MID 4	-5.66552	-5.46287
Auquimarca	6694				Md	MID 5	-5.9203	-5.94812
Auquimarca	6695				Md	MID 6	-5.92862	-5.92696
Auquimarca	6696				Md	MID 7	-6.31023	-6.8711
Auquimarca	6697				Md	MID 8	-6.90573	-8.23842
Auquimarca	6698				Md	MID 9	-7.09654	-7.4849
Auquimarca	6699				Md	OCC	-7.24516	-8.80929
Auquimarca	6586	AM-151	B5	Md M2	Md	CEJ	-11.3786	-5.71512
Auquimarca	6587				Md	MID 1	-10.6922	-7.4425
Auquimarca	6588				Md	MID 2	-11.0374	-7.72791
Auquimarca	6589				Md	MID 3	-12.0279	-8.35859
Auquimarca	6590				Md	MID 4	-8.82061	-10.4003
Auquimarca	6591				Md	OCC	-11.4419	-8.58112
Auquimarca	6779	AM-152	D5	Mx M2	Mx	CEJ	-9.78984	-8.92765
Auquimarca	6780				Mx	MID 1	-9.9133	-7.09656
Auquimarca	6781				Mx	MID 2	-10.1693	-5.41639
Auquimarca	6782				Mx	MID 3	-10.4804	-5.10954
Auquimarca	6783				Mx	MID 4	-10.7695	-5.00259
Auquimarca	6784				Mx	OCC	-11.2995	-6.50385
Auquimarca	6704	AM-153	E11	Md M1	Md	CEJ	-10.4649	-2.41639
Auquimarca	6705				Md	MID 1	-9.86876	-4.33699
Auquimarca	6706				Md	MID 2	-9.95133	-5.23347
Auquimarca	6707				Md	MID 3	-9.55459	-6.45304
Auquimarca	6708				Md	MID 4	-8.88195	-6.99053
Auquimarca	6709				Md	MID 5	-8.02604	-7.28071
Auquimarca	6710				Md	OCC	-7.4109	-6.96362
